# Supplementary material for: An efficient hydrogen evolution photocatalyst of Rh@Cr2O3-loaded PbMoO4 twenty-six facet polyhedrons
Source: Royal Society of Chemistry journal article supplement (doi:10.1039/d2nj02696a), 2022-01-01
Supplement: d2nj02696a1.pdf [file d2nj02696a1.pdf]

## An efficient hydrogen evolution photocatalyst of Rh@Cr<sub>2</sub>O<sub>3</sub> loaded PbMoO<sub>4</sub> twenty-six facets polyhedron

Jing Zhang<sup>1</sup>, Chunlei Li<sup>2\*</sup>, Xingzhi Jin<sup>2</sup> and Yi Zheng<sup>2\*</sup>

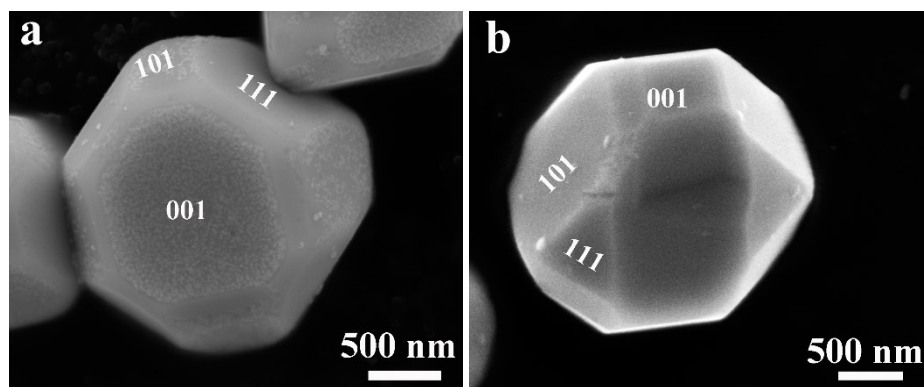

Figure S1 SEM images of (a) PM/Pt, (b) PM/Rh

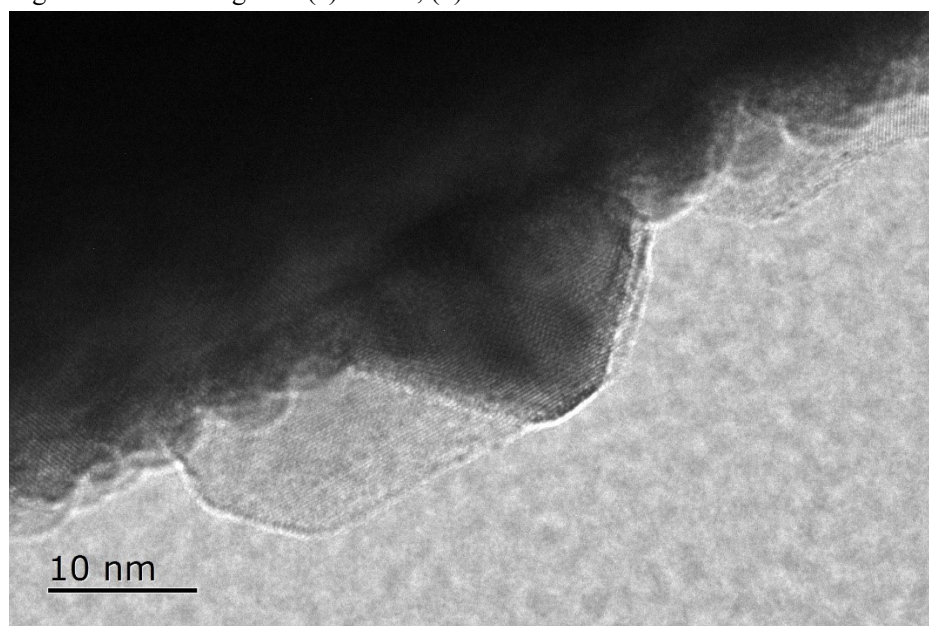

Figure S2 HRTEM of PM/Rh@Cr<sub>2</sub>O<sub>3</sub>

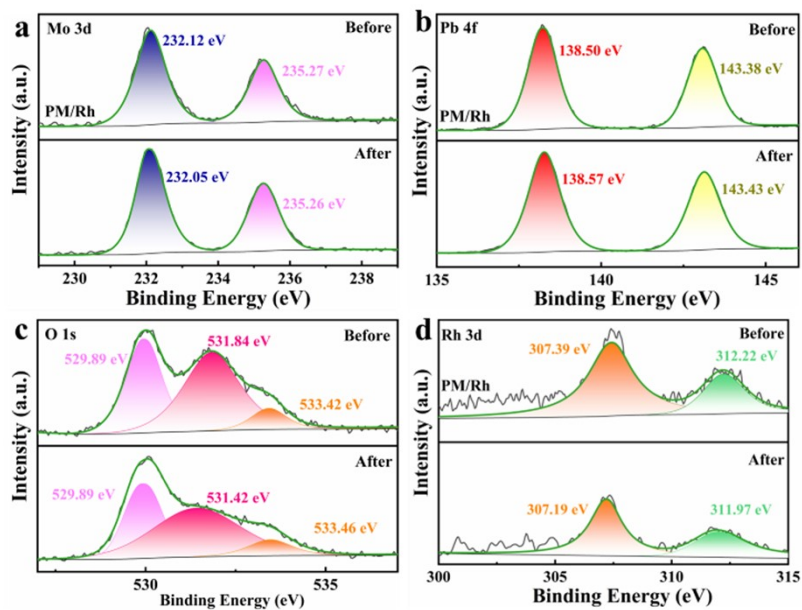

Figure S3 the XPS of PM/Rh before and after HER

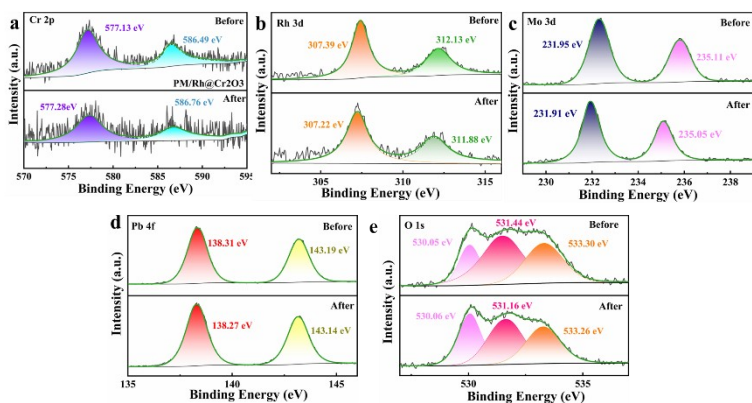

Figure S4 the XPS of PM/Rh@Cr<sub>2</sub>O<sub>3</sub> before and after HER
